# Supplementary material for: Elucidation of Novel Structural Scaffold in Rohu TLR2 and Its Binding Site Analysis with Peptidoglycan, Lipoteichoic Acid and Zymosan Ligands, and Downstream MyD88 Adaptor Protein
Source: Hindawi journal article supplement (doi:10.1155/2013/185282), 2013-01-01
Supplement: f1 [file 185282.f1.pdf]

**Table S1.** Cross-check validation report of homology models

| <b>Cross-check</b>           | <b>Ramachandran plot statistics by PROCHECK</b> |                       |              |           |              |           |
|------------------------------|-------------------------------------------------|-----------------------|--------------|-----------|--------------|-----------|
|                              | <b>2Z81</b>                                     |                       | <b>1O77</b>  |           | <b>2Z5V</b>  |           |
|                              | <b>X-ray</b>                                    | <b>HM<sup>a</sup></b> | <b>X-ray</b> | <b>HM</b> | <b>X-ray</b> | <b>HM</b> |
| Most favored regions         | 82.9                                            | 86.4                  | 81.4         | 88.5      | 75.4         | 86.6      |
| Additionally allowed regions | 16.7                                            | 10.2                  | 17.1         | 9.2       | 23.8         | 11.8      |
| Generously allowed regions   | 0.4                                             | 2.6                   | 1.6          | 0.8       | 0.8          | 0.8       |
| Disallowed regions           | 0.0                                             | 0.8                   | 0            | 1.5       | 0            | 0.8       |

<sup>a</sup> HM- homology models

**Table S2.** List of predicted binding sites in rohu TLR2-ECD

| <b>Binding sites</b> | <b>Amino acids</b>                                             |
|----------------------|----------------------------------------------------------------|
| B1                   | Thr273, Leu276, Val278, Ser304, Leu311                         |
| B2                   | Lys236, Arg241, Glu247, Phe275, Val278,                        |
| B3                   | Lys168, Leu177, Phe182, Leu187, Ser194, Leu206, Leu223         |
| B4                   | Ala534, Gly535, Asn537, Val540, Leu555, Val567                 |
| B5                   | Asn392, Leu396, Ser399, Tyr421, Asp423, Phe444, Ser448, Ser469 |
| B6                   | Ser245, Thr248, Lys258, Leu272, Val278, Asp280                 |
| B7                   | Ile487, Thr495, Leu496, Met517, Asn519, Asp522                 |
| B <sub>mouse</sub>   | Asn318, Asp320, Gly323, Gln332, His341, Gly348, Val350         |

**Table S3.** The predicted interface residues in TLR2-TIR and MyD88-TIR domains

|                     | <b>TLR2-TIR</b>                                                                                                                                | <b>MyD88-TIR</b>                                                                                                                                                              |
|---------------------|------------------------------------------------------------------------------------------------------------------------------------------------|-------------------------------------------------------------------------------------------------------------------------------------------------------------------------------|
| <b>cons-PPISP</b>   | H672, A676, C678, D683, F684, P686, G687, R688, W689, V691, D692, I694, D696, I698, S701, R719, L722, S725, H726, R728, H733, S736             | C44, V45, A49, S50, E51, L52, E54, K55, R56, R59, K79, F80, L82, S83, L84, C85, P86, W127, R129, L130, K133, S136, L137                                                       |
| <b>PatchDock</b>    | R645, Y646, V650, S651, Q685, I698, E699, K700, S701, H702, T704, L722, H726, F727, R728, I729, D731, H733, N734, D735                         | A81, L82, S83, L84, P86, G87, T88, H89, S90, K91, R92, L109, R110, F111, C115, D116, T118, R119, Q123, S121, F126                                                             |
| <b>InterProSurf</b> | D646, D647, I663, V665, P666, F675, A676, L677, I690, V691, D692, I694, S701, H702, R703, S725, H726, F727, R728, I729, V738, P751, L767, E768 | C9, S11, H17, E18, K21, C33, F35, V39, W46, T47, F76, Q77, F80, L82, S83, H89, P104, F105, L109, R110, F111, I114, C115, D116, W125, F126, W127, I128, R129, A131, L135, S136 |

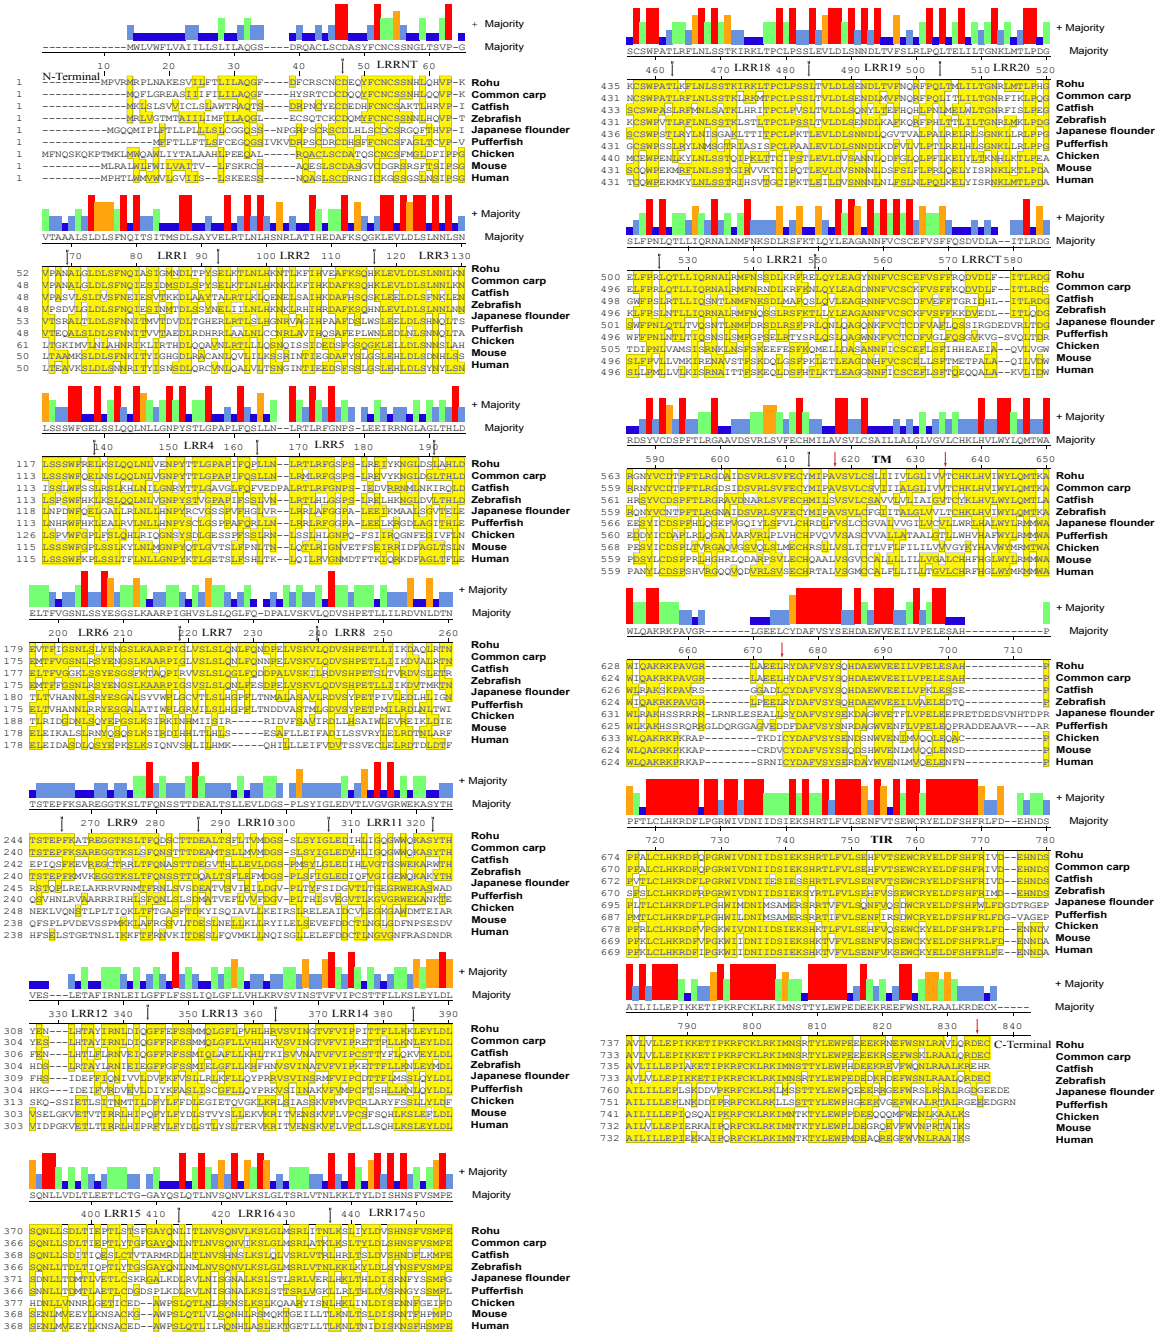

**Supplementary figure 1.** Multiple sequence alignment of rohu TLR2 with other species by MegAlign program. N-termini, C-termini, LRR, trans-membrane (TM) and TIR domain regions are labeled. Conserved residues are shown inside yellow box. Majority axis represents the highest occurrence of a residue in a column.

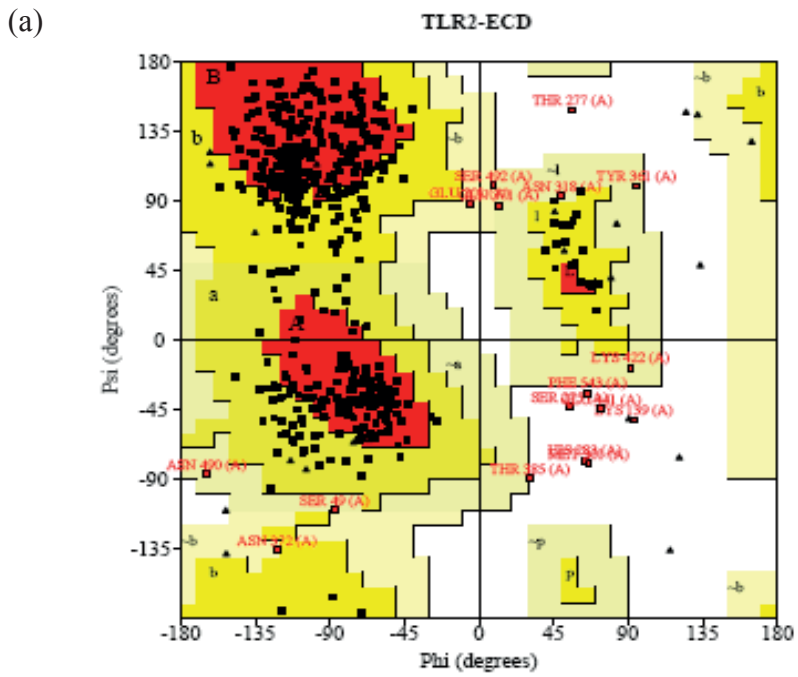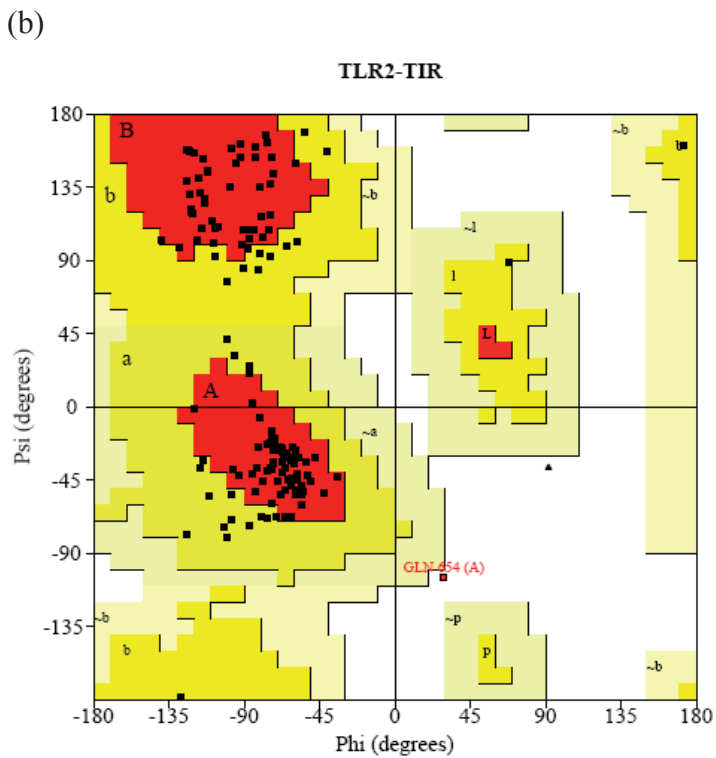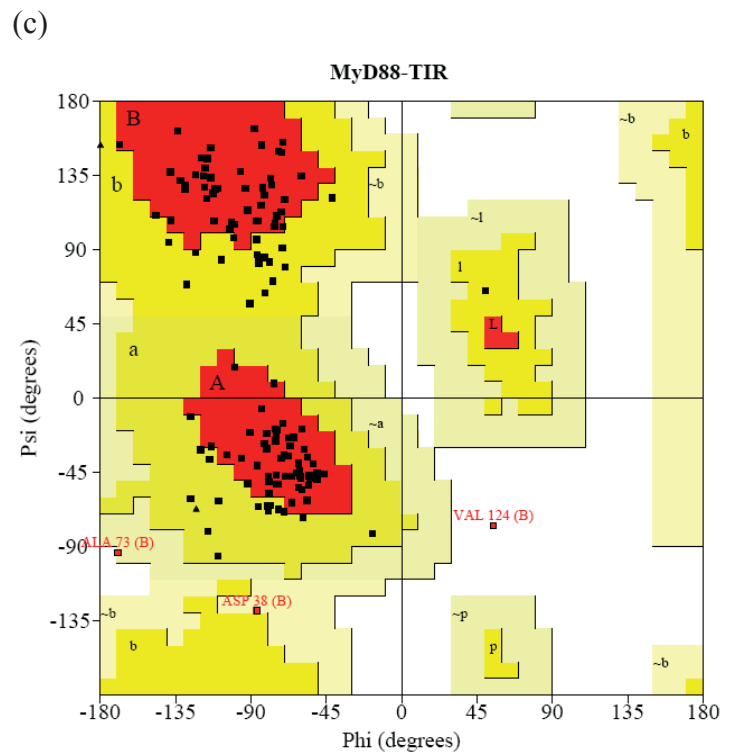

### Supplementary Figure 2.

Ramachandran plot analysis of (a) TLR2-ECD, (b) TLR2-TIR and (c) MyD88-TIR model. The plot was calculated in PROCHECK program

(a)

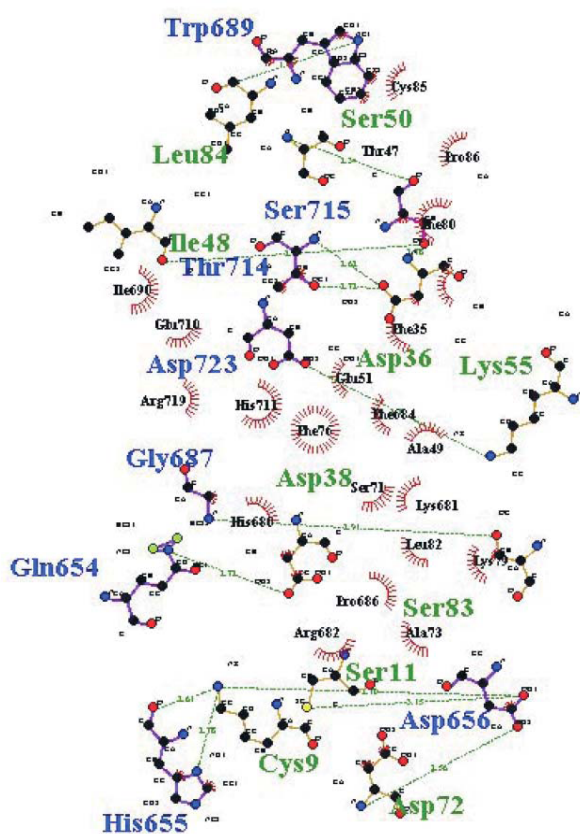

(b)

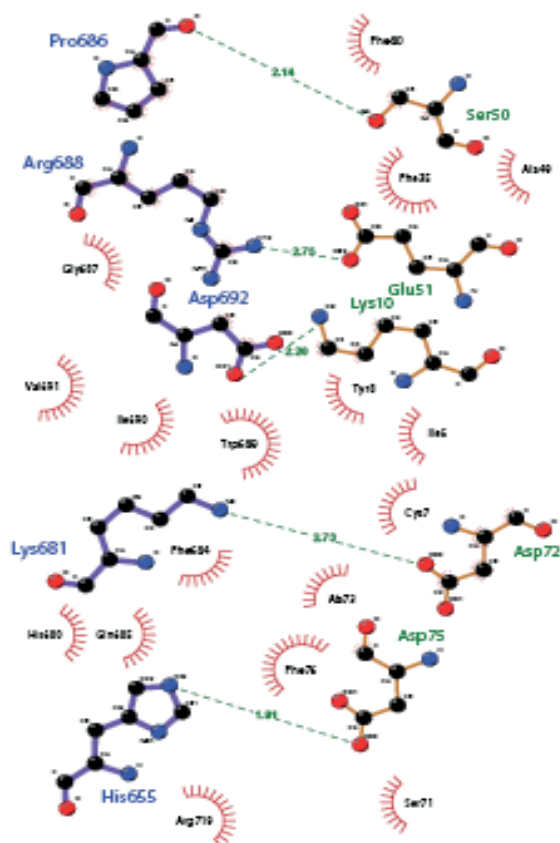

### Supplementary Figure 3.

DIMPLLOT analysis of interaction between TLR2-TIR and MyD88-TIR domains (a) HADDOCK analysis and (b) ZDOCK analysis

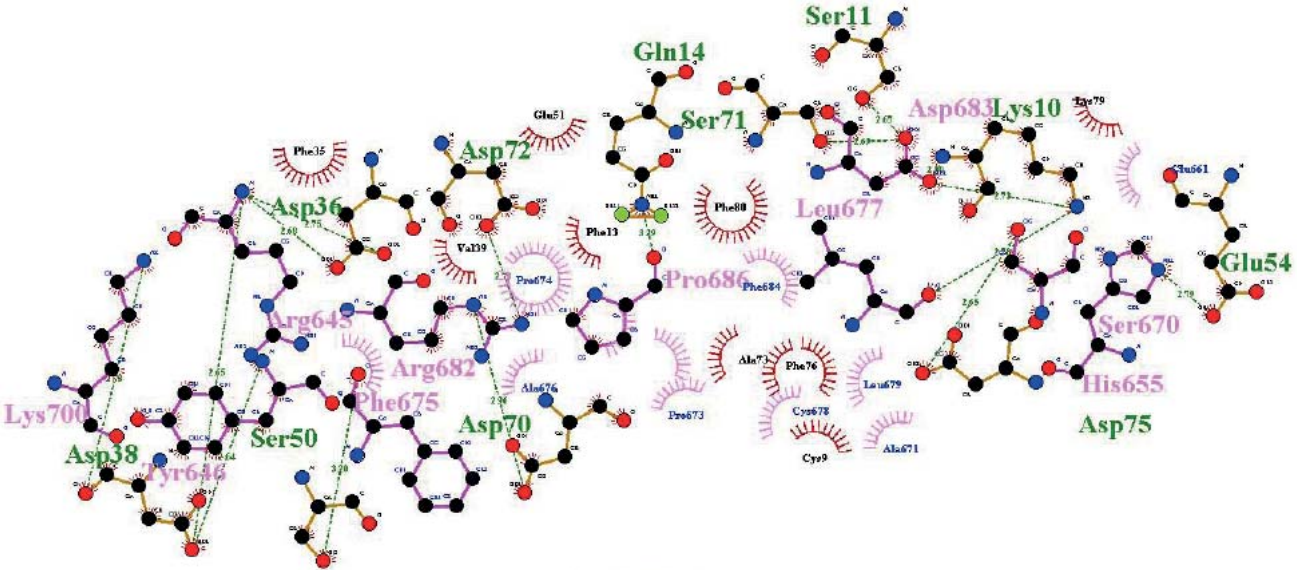

#### Supplementary Figure 4.

The DIMPLOT analysis of TLR2-TIR and MyD88-TIR complex after 10 ns of MDS
